Research Article 1

2

**Physicians' attitudes and perceived barriers toward  
ward-based clinical pharmacist in hospital settings:  
Responses from a national survey** 3  
4  
5

6

7

**Najmaddin A. H. Hatem<sup>1</sup>, Mohammed A. Kubas<sup>2,3</sup>, Seena A. Yousuf<sup>4</sup>, Abdunaser  
Rasam<sup>5</sup>, Mohamed Izham Mohamed Ibrahim<sup>6</sup>** 8  
9

10

<sup>1</sup>Department of Clinical Pharmacy, College of Clinical Pharmacy, Hodeidah University, Al-  
Hudaydah, Yemen. 11  
12

<sup>2</sup>Clinical Pharmacy Department, School of Pharmacy & Medical Sciences (SPMS),  
Lebanese International University, Sana'a, Yemen. 13  
14

<sup>3</sup>Clinical Pharmacy Department, University of Science and Technology (UST) Hospital,  
Sana'a, Yemen. 15  
16

<sup>4</sup>Social Medicine and Public Health Department, Faculty of Medicine and Health Sciences,  
Aden University, Aden, Yemen 17  
18

<sup>5</sup>Clinical Pharmacy Department, The 48 Hospital, Sana'a, Yemen. 19

<sup>6</sup>Department of Clinical Pharmacy and Practice, College of Pharmacy, Qatar University, QU  
Health, Doha, Qatar. 20  
21

22

**Corresponding author** 23

[clin.pharm.najmaddin@gmail.com](mailto:clin.pharm.najmaddin@gmail.com) (NAHH) 24

25

## Abstract

26

Clinical pharmacy services CPSs are still in their infancy in Yemen. Furthermore, pharmacists are not members of a multidisciplinary healthcare team, and their responsibilities are limited to drug dispensing and marketing. Thus, this study investigates physicians' attitudes and perceived obstacles toward clinical pharmacists working in hospitals' medical wards. A descriptive observational study was carried out using a validated self-administrated bilingual questionnaire. The study's questionnaire was conducted among physicians in three teaching hospitals. Those hospitals were at the front to establish clinical pharmacy units and embrace clinical pharmacy services. Sixty-five responses were included. our data results indicated that physicians believed the most contributions for clinical pharmacists to improve patient care was "Attend medical rounds" 70.8%, followed by "Order review". About 75% of physicians showed positive attitudes toward the clinical pharmacist role. However, more than 70% of physicians thought that clinical pharmacists should leave patient care to other healthcare members and care about drug products. There were Nine potential barriers out of 18 barriers were identified. Not enough clinical pharmacist staff working in the health center was considered as the top perceived barrier 83.1%; followed by clinical pharmacist responsibilities were not clearly defined", and "clinical pharmacist recommendations are not properly documented". In terms of enhancing physicians' general attitudes and overcoming reported barriers. Strategies to expand clinical pharmacy services in Yemen should be emphasized on both, protocols should be established to outline how clinical pharmacists and physicians should collaborate besides, inter-professional collaboration relations are needed to be developed to overcome resistance and raise knowledge and awareness of CPS adoption among the healthcare team members.

51

**Keywords:** Clinical pharmacist; clinical pharmacy services; attitudes; physicians; collaboration; Yemen.

52

53

54

55

## Introduction

56

Clinical pharmacy is described by the American College of Clinical Pharmacy as the "area of pharmacy concerned with the science and practice of rational drug use" [1]. Clinical pharmacists offer patient-centered services that have evolved to ensure the most effective use of drugs for standard drug therapy [2]. Specifically, those services are designed to optimize therapeutic effect [3,4], minimize risks [5], save cost [6, 7] and put the patient at the forefront of all acts. Clinical pharmacy services CPSs are provided by pharmacists in the healthcare environment in collaboration with physicians and can include counseling and patient education, comprehensive medication management, chronic care management, and population health management for several disease states [8,9]. Clinical pharmacist-physician collaboration in hospital [10] and primary care settings [11,12] have led to improved clinical outcomes for patient with a variety of diseases including osteoporosis [12], diabetes mellitus [13,14,11], hypertension [15,16], hyperlipidemia[17] and infectious disease like HIV and COVID-19 [18,19].

Pharmacists have been demanded to participate in clinical duty and accountability during the last 25 years, specifically with the establishment and application of Hepler and Strand's [20] concept of the 'pharmaceutical care' paradigm. Many developed countries are either in the process of recognizing pharmacists as independent clinical practitioners or have already done so. In the United Kingdom, pharmacists can now not only distribute but also prescribe medications [21]. In Canada, pharmacists assist physicians to design a patient's prescription regimen [22]. In Australia, pharmacists give consultation services to individuals who have been referred by their general practitioner (GP) [23]. Furthermore, in some healthcare settings in the USA, they are part of a multi-disciplinary intensive care unit team that contributes to the care of patients [24]. However, considering the certain improvements in the pharmacy profession in a few advanced nations, there remains persistent opposition to the expansion of clinical pharmacy practice in both developed and developing countries [25,26,27]. CPSs, for example, have not been extensively utilized in Swedish hospitals. According to studies from Iran, Nigeria, Pakistan and Yemen ineffective clinical training, the view of pharmacists as dispensers by other healthcare

practitioners, and a lack of regulation are all factors that negate pharmacists' 87  
clinical tasks [28,29,30,31]. 88

Yemen is an economically low-income developing country in the medial 89  
east region. Clinical pharmacy services are still in their infancy in Yemen. Further, 90  
pharmacists are not members of a multidisciplinary healthcare team, and their 91  
responsibilities are limited to drug dispensing and marketing. Although the current 92  
model of direct patient treatment still needs to be completely implemented [32]. 93  
However, pharmacists' functions are evolving to keep up with the demands of a 94  
modern healthcare system. whereas, Clinical pharmacy administration was established 95  
by the Ministry of Health (MOH) in 2019. Concurrently, the Ministry of Health 96  
released the first national clinical pharmacy guideline, outlining job responsibilities 97  
and allowing clinical pharmacists to register their interventions as part of clinical 98  
pharmacy services. Moreover, 8 colleges are offering clinical pharmacy programs five 99  
of them established 5 years bachelor of clinical pharmacy, and the other three colleges 100  
provided 6 year Pharm.D program. however, the Ministry of Higher Education and 101  
Ministry of Health consider all those who graduated from both programs to be 102  
bachelor's degree holders. In 2011, Hodeidah University became the first university to 103  
offer a clinical pharmacy program, and in 2013, it established the first independent 104  
college of clinical pharmacy. 105

Previous research have indicated that there are some variations in how doctors 106  
see various types of CPSs [33-43] and that doctors seem to have an improved 107  
perception of CPSs if they interact with pharmacists more often [33,37-41]. Doctors 108  
in Sweden are sceptical of the expertise and understanding of clinical pharmacists 109  
[33]. Moreover, medical students from a Midwestern medical school in the United 110  
States do not believe that the task of a pharmacist duties include patient screening and 111  
physical examination [44]. Concerns about a pharmacist's clinical competency 112  
continue to exist in Sierra Leone [37]. When it came to advanced clinical pharmacy 113  
tasks like interfering in prescriptions and pharmaceutical therapy, consultations, 114  
prescribing, etc., people in Pakistan were skeptical and the concept of pharmacists 115  
joining an allied healthcare team was not accepted well with the doctors [38]. 116

In conclusion, it is critical to highlight that successful clinical pharmacy service 117  
delivery primarily depends on physician collaboration. Hence, exploring physicians' 118

attitudes toward clinical pharmacists is critical in implementing and moving clinical pharmacy forward. Furthermore, clinical pharmacists face numerous challenges when implementing their services; thus, it is critical to recognize the factors that impede clinical pharmacist interventions, as well as to address those challenges in the future and extend the scope of clinical pharmacist interventions [20]. At the time of writing this article, just three hospitals had introduced clinical pharmacy services and included clinical pharmacists in separate wards. Therefore, such a research has yet to be undertaken to investigate physicians' attitudes and perceived obstacles to physicians working with ward-based clinical pharmacists in Yemeni hospitals. Further, we aimed to examine whether the attitudes of physicians affected by socio-demographic factors of the respondents.

## Methodology

### Study setting

This study was conducted in three teaching hospitals. Those hospitals were at the front to establish clinical pharmacy units and embrace clinical pharmacy services. At the time of preparing this paper, no other hospitals are providing clinical pharmacy services or employing clinical pharmacists in Yemen. The University of Science and Technology Hospital (USTH) is one of the most prestigious medical institutions in the country. The USTH is located in the capital of Yemen. No clinical pharmacists graduated from Yemeni universities when the clinical pharmacy unit was founded in 2013. Hence, the USTH and 48 Hospital hired clinical pharmacists who earned their master's degrees in a clinical pharmacy outside of Yemen. The 48 Hospital also located in Sana'a and it is the university hospital of 21 of September university. Althowrah Hospital- Al-Hudaydah (AHA) is the first governmental hospital that started to provide clinical pharmacy services in 2017. (AHA) located in Al-Hudaydah city. Which is nearly 217 Km far from the capital. It began by hiring only those with a Bachelor's degree in clinical pharmacy from Hodeidah University. Since it was the first governmental university to launch a clinical pharmacy program, it has been a leader in the field.

## **Study Design and study tool** 150

A descriptive observational study was carried out from September to November 2021 using a self-administrated questionnaire developed to determine the physician attitudes and barriers toward clinical pharmacists in two teaching hospitals. The questionnaire was adopted from previous quantitative studies with minor modifications. The questionnaire will be introduced in both Arabic and English language. The questionnaire included both closed and open-ended questions. It consists of three parts. The socio-demographic information of physicians' Age, gender, Years of experience in practice, and current area of practice were represented in the first part. In the second part, the 5-Likert scale of (Strongly agree = 5, Agree = 4, Neutral = 3, Disagree = 2, and Strongly disagree = 1) was used to assess physicians' attitudes by using 16 questions adopted from previous studies [41- 43]. The third part was concerned with the barriers that may hinder the clinical pharmacists' contributions to the health care team those questions were adopted from existent literature [34,35]. Two independent academic members from the faculty of pharmacy pre-tested the questionnaire for suitability and content relevance. The questionnaire was additionally reviewed by other three physicians for relevance, clarity, conciseness, and simplicity of the items. The questionnaire's final version included feedback from experts.

## **Ethical approval** 169

All participants who took part in the study gave their verbal permission. The Deanship of College of Clinical Pharmacy at Hodeidah University, Al-Hudaydah, Yemen accepted the study's design and methodology in compliance with the Declaration of Helsinki with Reference No. (DM-2-1255).

## **Data Collection** 174

After receiving permission from the hospital's administrators. Questionnaires were distributed by three well-trained and non-pharmacy-related majors. They handled the questionnaires to physicians. And due to the physician's nature of work the questionnaires were left with them, and then after three days responses were gathered and forwarded to the lead researchers. The study was conducted between July 2021 to February 2022.

## Data Analysis 181

To analyze the data, they were first entered and coded in Excel, then imported into SPSS version 26.0 (SPSS, Chicago, IL, USA). To summarize categorical data, basic descriptive statistics including frequency, percentage, mean, and standard deviations were used. Cronbach's alpha was used to measure the overall reliability and internal consistency of the questionnaire. Its total value was 0.831, and each item scored more than 0.8. During the data analysis attitude's items were categorized to (positive/negative) were attitude's item that has a Mean of 4 or more was considered positive attitude's item. While, in barriers items were categorized to (Potential/non-potential barriers), were barrier that has a Mean of 3 or more considered potential barrier. To examine the relationship between a dependent variable (attitude and barriers) and demographic factors (age, gender, occupation, and years of experience), logistic regression was used at an alpha level of 0.05.

## Results 195

Sixty-five responses were included (60% response rate). In Table 1. more than three-quarters of them 76.9% were males, and more than half were under 40 years old. Nearly 37% of physicians were specialists, and the majority have experience more than 15 years of practice. About 31% work in the internal medicine ward. Around two-thirds of the participants either had "Never" 12.3% or "Rarely" 21.5% had working experience with a clinical pharmacist. 40% of physicians rat that clinical pharmacist services provided in the included hospitals were "Acceptable" in terms of meeting the patient's needs. Also, our data results indicated that physicians believed the most contributions for clinical pharmacists to improve patient care were "Attend medical rounds" 70.8%, followed by "Order review" and "Patient education" 58.5%, and 52.3% respectively more information can be found in Table 2.

**Table 1.** Socio-demographic information of participant physicians.

210

| Variables                 | N  | %    |
|---------------------------|----|------|
| <b>Sex</b>                |    |      |
| Male                      | 50 | 76.9 |
| Female                    | 15 | 23.1 |
| <b>Age (years)</b>        |    |      |
| <30                       | 15 | 23.1 |
| 30-39                     | 20 | 30.8 |
| 40-49                     | 21 | 32.3 |
| ≥50                       | 9  | 13.8 |
| <b>Professional role</b>  |    |      |
| Consultant                | 12 | 18.5 |
| Specialist                | 24 | 36.9 |
| Resident                  | 12 | 18.5 |
| GP                        | 17 | 26.2 |
| <b>Experience (years)</b> |    |      |
| 0-3                       | 18 | 27.7 |
| 4-7                       | 11 | 16.9 |
| 8-11                      | 5  | 7.7  |
| 12-15                     | 7  | 10.8 |
| >15                       | 24 | 36.9 |
| <b>Area of Practice</b>   |    |      |
| Internal Medicine         | 20 | 30.8 |
| Obstetrics and gynecology | 7  | 10.8 |
| Critical Care             | 3  | 4.6  |
| Pediatrics                | 8  | 12.3 |
| Surgery                   | 17 | 26.2 |
| Other                     | 10 | 15.4 |
| <b>Type of Hospital</b>   |    |      |
| Governmental              | 25 | 38.5 |
| Private                   | 21 | 32.3 |
| Both                      | 19 | 29.2 |

211

212

213

214

215

216

217

218

219



**Table 2.** Physicians’ working experience, perception, and contribution area of ward-based clinical pharmacist. 220  
221

| Variables                                                                          | N  | %    |
|------------------------------------------------------------------------------------|----|------|
| <b>Experience working with clinical Pharmacist</b>                                 |    |      |
| Never                                                                              | 8  | 12.3 |
| Rarely                                                                             | 14 | 21.5 |
| Sometimes                                                                          | 30 | 46.2 |
| Often                                                                              | 10 | 15.4 |
| Always                                                                             | 3  | 4.6  |
| <b>Clinical pharmacist meets the needs in terms of patient care</b>                |    |      |
| Not at all                                                                         | 9  | 13.8 |
| Poor                                                                               | 10 | 15.4 |
| Acceptably                                                                         | 26 | 40.0 |
| Adequately                                                                         | 16 | 24.6 |
| Very adequately                                                                    | 4  | 6.2  |
| <b>Most important contribution for clinical pharmacist to improve patient care</b> |    |      |
| Attend medical rounds                                                              | 46 | 70.8 |
| Being available for consultation                                                   | 32 | 49.2 |
| Patient education                                                                  | 34 | 52.3 |
| Order review                                                                       | 38 | 58.5 |
| Staff education                                                                    | 27 | 41.5 |
| Attend clinic                                                                      | 15 | 23.1 |

222

In Table 3. About 75% of physicians showed positive attitudes toward clinical pharmacists with a mean and standard deviation of 4.06±0.43. More than 90% of physicians positively welcomed the clinical pharmacist to participate in the medical ward round, "monitor patients’ responses to drug therapy from a toxicity/side effects perspective" and "believed that clinical pharmacists can improve the overall patient outcome/quality of patient life". Moreover, 89.2% of physicians positively thought that "clinical pharmacists can provide drug information to other healthcare team members regarding compatibility, stability, storage, and availability". However, more than 70% of physicians thought that clinical pharmacists should leave the patient care to other healthcare members and care about drug products, and a good number of physicians negatively thought "clinical pharmacist can be involved in drug selection", and "Clinical pharmacist should analysis patient and treatment and suggest changes of therapy when necessary". While the statement " the current setup appropriate for the provisions of clinical pharmacy services" received the lowest agreement 49.3%; around 29% of physicians were "Neutral".

223  
224  
225  
226  
227  
228  
229  
230  
231  
232  
233  
234  
235  
236  
237

**Table 3.** Attitudes of physicians toward ward-based clinical Pharmacist role.

238

| Statement                                                                                                                              | Strongly agree | Agree     | Neutral   | Disagree | Strongly disagree | Mean ± SD   | Attitude (positive/negative) |
|----------------------------------------------------------------------------------------------------------------------------------------|----------------|-----------|-----------|----------|-------------------|-------------|------------------------------|
| Clinical pharmacist participation in medical ward round is desirable.                                                                  | 31 (47.7)      | 28 (43.1) | 4 (6.2)   | 2 (3.1)  | --                | 4.35 ± 0.73 | Positive attitude            |
| Clinical pharmacist can play important role in patient education and counseling.                                                       | 28 (43.1)      | 26 (40.0) | 11 (16.9) | --       | --                | 4.26 ± 0.73 | Positive attitude            |
| Clinical pharmacist can monitor patient response to drug therapy from toxicity/side effects perspective.                               | 29 (44.6)      | 31 (47.7) | 4 (6.2)   | 1 (1.5)  | --                | 4.35 ± 0.67 | Positive attitude            |
| Clinical pharmacist can monitor patient response to drug therapy from effectiveness perspective.                                       | 18 (27.7)      | 33 (50.8) | 12 (18.5) | 2 (3.1)  | --                | 4.03 ± 0.77 | Positive attitude            |
| Clinical pharmacist can involve in drug selection (drug, dosage form) based on patient and drug factors.                               | 14 (21.5)      | 31 (47.7) | 15 (23.1) | 2 (3.1)  | 3 (4.6)           | 3.78 ± 0.97 | Negative attitude            |
| Clinical pharmacist can provide drug information to health care professionals such as compatibility, stability, storage, availability. | 22 (33.8)      | 36 (55.4) | 7 (10.8)  | --       | --                | 4.23 ± .63  | Positive attitude            |
| Clinical pharmacist can detect and prevent medication use errors.                                                                      | 20 (30.8)      | 37 (56.9) | 7 (10.8)  | 1 (1.5)  | --                | 4.17 ± 0.67 | Positive attitude            |
| Clinical pharmacy service enhances patients' appreciation and satisfaction.                                                            | 18 (27.7)      | 33 (50.8) | 12 (18.5) | 2 (3.1)  | --                | 4.03 ± 0.77 | Positive attitude            |
| Clinical pharmacist should take patients medication history at admission.                                                              | 25 (38.5)      | 30 (46.2) | 8 (12.3)  | 2 (3.1)  | --                | 4.20 ± 0.77 | Positive attitude            |
| Clinical pharmacist should have access to patients chart and have a place to document their service.                                   | 26 (40.0)      | 26 (40.0) | 10 (15.4) | 1 (1.5)  | 2 (3.1)           | 4.12 ± 0.94 | Positive attitude            |
| Clinical pharmacist should analyses patient treatment and suggest changes of therapy when necessary.                                   | 20 (30.8)      | 30 (46.2) | 9 (13.8)  | 3 (4.6)  | 3 (4.6)           | 3.94 ± 1.03 | Negative attitude            |
| Clinical pharmacist should care about drug products and leave patient care to Doctors, Health Officers and nurses.                     | 16 (24.6)      | 31 (47.7) | 9 (13.8)  | 7 (10.8) | 2 (3.1)           | 3.80 ± 1.03 | Negative attitude            |
| The current setup (infrastructure and environments of your hospitals) appropriate for the provisions of clinical pharmacy service.     | 2 (3.1)        | 30 (46.2) | 19 (29.2) | 9 (13.8) | 5 (7.7)           | 3.23 ± 0.99 | Negative attitude            |
| Clinical pharmacy service initiation is desirable in Yemen health care system.                                                         | 20 (30.8)      | 33 (50.8) | 10 (15.4) | --       | 2 (3.1)           | 4.06 ± 0.86 | Positive attitude            |
| Clinical pharmacist can improve overall patient outcome /quality of patient care.                                                      | 24 (36.9)      | 36 (55.4) | 4 (6.2)   | 1 (1.5)  | --                | 4.28 ± 0.65 | Positive attitude            |
| Overall attitude (mean ± SD)                                                                                                           | 4.06 ± 0.43    |           |           |          |                   |             |                              |

239

240

Among the 18 barriers that were included in the study's questionnaire (Table 4.), there were nine potential barriers were identified. Not enough clinical pharmacist staff working in the health center was considered as the top perceived barrier 83.1%;

241

242

243

followed by clinical pharmacist responsibilities were not clearly defined", "clinical pharmacist recommendations are not properly documented", and "Administration does not supportively enough clinical pharmacy services" 81.5%, 53.8%, and 52.3% respectively. While the statement that clinical pharmacist needs more confidence to interact with other healthcare team received the lowest agreement to be a potential barrier 32.5%.

**Table 4.** Barriers that can hinder ward-based clinical pharmacist's role with physicians. 250

| Statement                                                                                                   | Strongly agree | Agree     | Neutral   | Disagree  | Strongly disagree | Mean ± SD  | Potential/non-potential barrier |
|-------------------------------------------------------------------------------------------------------------|----------------|-----------|-----------|-----------|-------------------|------------|---------------------------------|
| The specific responsibilities of a clinical pharmacist are not clearly defined.                             | 16 (24.6)      | 37 (56.9) | 10 (15.4) | 2 (3.1)   | --                | 4.03± 0.73 | Potential barrier               |
| There are not enough number of clinical pharmacists staff in the health center that we are working in.      | 16 (24.6)      | 38 (58.5) | 5 (7.7)   | 6 (9.2)   | --                | 3.98± 0.84 | Potential barrier               |
| Administration does not supportively enough clinical pharmacist services.                                   | 12 (18.5)      | 22 (33.8) | 22 (33.8) | 7 (10.8)  | 2 (3.1)           | 3.54± 1.02 | Potential barrier               |
| The hospital that we work in is inconvenient.                                                               | 4 (6.2)        | 12 (18.5) | 17 (26.2) | 25 (38.5) | 7 (10.8)          | 2.71± 1.08 | Non-potential barrier           |
| Clinical pharmacist does not have good knowledge on disease management.                                     | 4 (6.2)        | 19 (29.2) | 23 (35.4) | 11 (16.9) | 8 (12.3)          | 3.00± 1.10 | Potential barrier               |
| Clinical pharmacist does not have good knowledge on drug related issues.                                    | 4 (6.2)        | 11 (16.9) | 22 (33.8) | 19 (29.2) | 9 (13.8)          | 2.72± 1.10 | Non-potential barrier           |
| Clinical pharmacist does not have enough confidence to interact with the health care team.                  | 6 (9.2)        | 21 (32.3) | 15 (23.1) | 18 (27.7) | 5 (7.7)           | 3.38± 2.60 | Potential barrier               |
| Clinical pharmacist is not interested to provide clinical pharmacy services.                                | 3 (4.6)        | 16 (24.6) | 15 (23.1) | 22 (33.8) | 9 (13.8)          | 2.72± 1.12 | Non-potential barrier           |
| Clinical pharmacists have inadequate communication skills needed for interaction with physicians.           | 3 (4.6)        | 20 (30.8) | 18 (27.7) | 16 (24.6) | 8 (12.3)          | 2.91± 1.11 | Non-potential barrier           |
| Clinical pharmacist recommendations are not properly documented.                                            | 8 (12.3)       | 27 (41.5) | 17 (26.2) | 12 (18.5) | 1 (1.5)           | 3.45± 0.98 | Potential barrier               |
| There is no continuity in the services provided by the clinical pharmacist due to other non-clinical roles. | 2 (3.1)        | 26 (40.0) | 24 (36.9) | 11 (16.9) | 2 (3.1)           | 3.22± 0.92 | Potential barrier               |
| Physicians are unaware of the benefits of having a clinical pharmacist on their team.                       | 4 (6.2)        | 26 (40.0) | 10 (15.4) | 19 (29.2) | 6 (9.2)           | 3.05± 1.15 | Potential barrier               |
| Physicians are unable to judge the knowledge and level of skills of the clinical pharmacist.                | 6 (9.2)        | 20 (30.8) | 12 (18.5) | 19 (29.2) | 8 (12.3)          | 2.95± 1.21 | Non-potential barrier           |
| Physicians have low trust in the clinical pharmacist's abilities.                                           | 1 (1.5)        | 16 (24.6) | 19 (29.2) | 19 (29.2) | 10 (15.4)         | 2.68± 1.06 | Non-potential barrier           |

|                                                                                                      |             |           |           |           |           |           | barrier               |
|------------------------------------------------------------------------------------------------------|-------------|-----------|-----------|-----------|-----------|-----------|-----------------------|
| Physicians have inadequate communication skills needed for interaction with the clinical pharmacist. | --          | 13 (20.0) | 19 (29.2) | 21 (32.3) | 12 (18.5) | 2.51±1.01 | Non-potential barrier |
| Physicians do not support adequately the clinical pharmacist services.                               | --          | 15 (23.1) | 22 (33.8) | 17 (26.2) | 11 (16.9) | 2.63±1.02 | Non-potential barrier |
| Physicians have no prior experience of working with a clinical pharmacist.                           | 7 (10.8)    | 23 (35.4) | 13 (20.0) | 17 (26.2) | 5 (7.7)   | 3.15±1.16 | Potential barrier     |
| Physicians believe that clinical pharmacists cannot be clinicians.                                   | 5 (7.7)     | 14 (21.5) | 13 (20.0) | 21 (32.3) | 12 (18.5) | 2.68±1.22 | Non-potential barrier |
| Overall barriers (mean ± SD)                                                                         | 3.07 ± 0.66 |           |           |           |           |           |                       |

251

252

253

## Discussion

254

This is the first observational study to highlight how clinical pharmacist roles are perceived by physicians with regards to their contribution to direct patient care and their participation in the healthcare team furthermore, identify important barriers that could hinder the role of clinical pharmacist in healthcare settings from a physician's point of view. The vast majority of physicians positively welcomed the clinical pharmacist's participation in the medical ward round and monitoring patients' response. However, more than 70% of physicians thought that clinical pharmacists should leave patient care to other healthcare members and care about traditional tasks. The current study revealed nine potential barriers were identified. Not enough clinical pharmacist staff working in the health center and "clinical pharmacist responsibilities were not clearly defined", were considered as the top two perceived barriers reported by physicians working in the three hospitals.

255

256

257

258

259

260

261

262

263

264

265

266

Clinical pharmacy services CPSs do exist in the sampled hospitals. However, clinical pharmacy is an entirely novel concept in the country's existing healthcare environment, and CPSs in those hospitals are still in their early stages, confined to medication related problem-solving and providing clinical suggestions for physicians in certain medical wards [3]. Physicians who responded to our survey rated clinical pharmacist services provided in the included hospitals as "Acceptable" in terms of

267

268

269

270

271

272

meeting the patient's needs. Also, our data results indicated that physicians believed 273  
that pharmacists can improve patient's life by performing extended patient-oriented 274  
roles such as attending medical rounds, order reviews, patient education, and being 275  
available for consultation. These findings are consistent with prior studies [36-38]. 276

### **Attitudes aspect** 277

The results demonstrate that physicians show positive attitudes toward clinical 278  
pharmacists with a mean and stander deviation of  $4.06 \pm 0.43$ . The vast majority of 279  
physicians positively welcomed "the clinical pharmacist's participation in the medical 280  
ward round, monitor patients' response to drug therapy from a toxicity/side effects 281  
perspective, and believe that clinical pharmacists can improve the overall patient 282  
outcome/quality of patient life". Moreover, they positively thought that clinical 283  
pharmacists can provide drug information to other healthcare team members. In the 284  
current study, physicians in Yemen encourage the clinical pharmacist's involvement 285  
in the clinical ward team, who may routinely seek guidance on patient medication. 286  
This conclusion is consistent with the findings of several earlier investigations 287  
[36,37,39]. In addition, physicians revealed that clinical pharmacists may enhance 288  
overall health outcomes and patient quality of life. These views are in agreement with 289  
those expressed earlier by Saudis and US doctors, who pointed out that clinical 290  
pharmacists' participation and recommendations increased the quality of patient care 291  
[40,45]. A recent studies found that clinical pharmacist intervention and engagement 292  
in clinical decisions can reduce hospital stays, medication errors, patient satisfaction, 293  
and the impact of quality of care [46,47,48,49]. 294

However, the results from our study demonstrate that physicians view traditional- 295  
tasks such as providing drug information regarding compatibility, stability, storage, 296  
and availability to be the responsibility of clinical pharmacists. While, the vast 297  
majority of them reported clinical pharmacists should leave the patient care to other 298  
healthcare members and care about drug products. This was expected since many 299  
low-income nations reported the responsibilities of the clinical pharmacist have been 300  
defined as subordinate to that of the physicians [35,50,51]. One probable explanation 301  
for these perceptions is that physicians are unaware of clinical pharmacists' expertise. 302  
When the clinical pharmacist and the physician continue to communicate and the 303  
pharmacist can share his/her expertise, physicians may see clinical pharmacists' 304

potential and significance to the health care team. International experience suggests 305  
that physicians' attitudes and acceptance of pharmacists' clinical duties have improved 306  
over time and have been attributed to physicians' interaction with pharmacists and 307  
continuous exposure to their services, with these negative attitudes often fading away 308  
[52,53,54,35]. Consequently, to maintain a successful working environment, a clear 309  
line must be placed between these skills and those of other medical professionals. In 310  
this country, the recently developing pharmacy curriculum included 311  
some instructions on analyzing patients' signs and symptoms, including physical 312  
examination and complete assessments of patients' biomarker profiles to determine 313  
patients' medication demands [32,55]. These capacities are shared by other medical 314  
practitioners. Pharmacists as clinicians are not widespread in Yemen pharmacy 315  
practice [32]. Hence, some physicians are in doubt of their skills and prefer their 316  
conventional dispensing orientation. 317

Additional explanation is lack of inter-professional education (IPE), which is driven 318  
by the fact that there is lately no established protocol outlining how clinical 319  
pharmacists and physicians should collaborate. Hence, inter-professional 320  
collaboration relations are needed to be developed to overcome resistance and raise 321  
knowledge and awareness of CPS adoption among the healthcare team members. 322  
Therefore, defining and describing each healthcare professional's tasks and 323  
responsibilities is crucial while creating a multidisciplinary healthcare team. 324  
Additionally, during both doctors' and pharmacists' undergraduate training programs, 325  
a collaborative or multidisciplinary work environment needs to be supported or 326  
fostered. 327

This study underlines the need of clinical pharmacists interacting effectively and often 328  
with physicians on the ward level in order to improve physicians' impressions of the 329  
role of CPSs in Yemen hospitals. It has also been revealed that decision makers' 330  
support for CPSs enhanced implementation. [56]. Hence, some schemes for incentives 331  
should be established to encourage clinical pharmacists for rational therapeutic 332  
decision-making and to deeply discuss medication selections during ward rounds with 333  
physicians. 334

Numerous research investigations have reported that with the changing level of 335  
pharmacy practice in recent years, younger physicians and physicians who have more 336

exposure to pharmacists' services in the hospital setting appeared to have higher 337  
expectations and attitudes toward pharmacists and were more accepting of 338  
pharmacists' new patient-focused roles [38,56]. In the current, we did not find any 339  
significant difference that supports this idea or any significant difference among other 340  
physicians' Socio-demographic information that was included in this study. Evidence 341  
was also in line with previous studies conducted [37,57,58]. 342

## **Barriers aspects** 343

Among the eighteen barriers that were included in the study's questionnaire, there 344  
were nine potential barriers were identified. When trying to carry out clinical tasks, 345  
pharmacists face challenges such as a lack of time, a shortage of staff, and a heavy 346  
workload [56,57,36]. According to the report released in 2019, the total number of 347  
pharmacists in Yemen reached  $\approx$  18,000 having one pharmacist for every 1700 [58]. 348  
Additionally, pharmacy technicians' professional actions are not regulated by any 349  
national or institutional policies. The evidence suggests that pharmacy technicians can 350  
assist pharmacists with logistical tasks, giving them time to spend on other patient 351  
care-related issues and to engage in more clinical activities [55]. 352

The current investigation provided evidence that the duties of clinical pharmacists are 353  
not well defined. Many studies conducted in other countries shared the same reported 354  
barrier [56,58,36]. Similar to this, in 2009 team members in a Canadian study of 355  
healthcare organizations pointed out that the lack of a defined role for pharmacists 356  
results in misconceptions and barriers that limit the provision of CPSs [49]. Currently, 357  
no clear model care has included clinical pharmacists in the healthcare system in 358  
Yemen and the traditional model care is the predominant model which is a triangle- 359  
like shape clearly stating that physicians are the only in clinical decision-making. 360

Therefore, implementing clinical pharmacy services necessitates the integration of a 361  
new cross-disciplinary collaboration model where pharmacists engage in clinical 362  
decision-making, as well as the introduction of a new profession into providing of 363  
healthcare. Additionally, different parts of the world where CPSs are being 364  
implemented for the first time in the nation's health system, new care models and the 365  
measures that correlate with them should be used [6,38,50]. As a result, increasing 366  
contact is required to increase awareness of CPSs and their advantages. When the task 367

of pharmacist clearly established, his performance in multidisciplinary patient-care teams improved. According to a previous investigation, an official statement of the duties assigned to each team member assists in promoting awareness of individual commitments and minimize conflict that arises from a lack of established limits [37,38,40]. Hence, the growing acceptability of clinical pharmacists and their pharmaceutical care interventions, which improve the standard of healthcare, could continue if physicians' and nurses' awareness of clinical pharmacy services and attitudes toward the profession significantly improved [37,38,39,40,59].

Clinical pharmacists can take on ever-expanding duties including managing patients' pharmacotherapy and therapeutic drug monitoring, both of which considerably enhance patient care [20,61]. The nature of their contacts affect how well clinical pharmacists and doctors work together to provide care to patients [13,60]. Clinical pharmacists may answer questions on a range of topics, such as drug profiles, dosages, adverse drug reactions, patient management, drug interactions, drug usage during pregnancy and lactation, poisons, and suggestions for drug storage [6,7,9]. They collaborate with patients and other healthcare providers to encourage and help patients adjust their lifestyles to achieve better health results. Improvements in patient care, level of awareness, and illness management have the effect of reducing risk factors and healthcare costs [10,12,13].

## **Limitations**

The relatively low response rate of 65 assessed surveys, which was lower than our projected response rate, is a drawback of our study. This was most likely affected by the research population's heavier workload. Another concern is the social desirability bias: respondents may have given favorable comments to adhere to the more socially accepted viewpoint. Furthermore, because the survey was conducted at a given time and certain hospitals, it does not account for any long-term changes in physicians' attitudes, or perceived barriers concerning ward-based clinical pharmacists and their services. Despite these drawbacks, we think these findings offer insightful information about how doctors feel about clinical pharmacists and the barriers preventing them from offering their recently introduced services.



## **Study implication on practice and recommendations** 399

When the clinical pharmacist and the physician continue to communicate and the pharmacist can share his/her expertise, physicians may see clinical pharmacists' potential and significance to the health care team. Consequently, to maintain a successful working environment, a clear line must be placed between these skills and those of other medical professionals. International experience suggests that physicians' attitudes and acceptance of pharmacists' clinical duties have improved over time and have been attributed to physicians' interaction with pharmacists and continuous exposure to their services, with these negative attitudes often fading away [52,53,54,35]. Further, ward-based pharmacists are still uncommon in Yemen, as previously said, and many doctors and nurses are not aware of the competencies that clinical pharmacists can preformed. The largest number of pharmacists continue to work in community pharmacies, where giving patients advice and collaborating with other health professionals are still their less preformed responsibilities in Yemen [46]. Hence, implementing clinical pharmacy services necessitates the integration of a new cross-disciplinary collaboration model where pharmacists engage in clinical decision-making, as well as the introduction of a new profession into providing of healthcare, in other words a protocol should be established to outline how clinical pharmacists and physicians should collaborate and inter-professional collaboration relations are needed to be developed to overcome resistance and raise knowledge and awareness of CPS adoption among the healthcare team members. Additionally, during both doctors' and pharmacists' undergraduate training programs, a collaborative or multidisciplinary work environment needs to be supported or fostered.

## **Conclusions** 423

In Yemen, physicians appreciate the role of clinical pharmacists in direct patient care but they preferred that clinical pharmacists focus more on drug product services such as drug information sources and patient education, while limiting drug selection and treatment change for physician responsibilities. A limited number of clinical pharmacists staff in hospitals and unclear definitions of clinical pharmacist roles were the most common barriers reported by Yemeni physicians. Protocols should be

established to outline how clinical pharmacists and physicians should collaborate and 430  
inter-professional collaboration relations are needed to be developed to overcome 431  
resistance and raise knowledge and awareness of CPS adoption among the healthcare 432  
team members. Additionally, during both doctors' and pharmacists' undergraduate 433  
training programs, a collaborative or multidisciplinary work environment needs to be 434  
supported or fostered. 435

## Acknowledgment 437

The second author would like to thank USTH for their financial support which allow 438  
him to copy and distribute the questionnaires' in the hospital. 439

## References 441

1. The definition of clinical pharmacy. American college of clinical pharmacy 442  
(ACCP). *Pharmacother.* 2008;28(6):816-817. 443
2. Barber N. Towards a philosophy of clinical pharmacy. *Pharm J.* 444  
1996;257:289–91. 445
3. Kubas MA, Halboup AM. Implementation of clinical pharmacist 446  
recommendations and services at a University Hospital in Yemen. *Int J Clin* 447  
*Pharm.* 42,51–56(2020) 448
4. Dunn et al. The Role of the Clinical Pharmacist in the Care of Patients With 449  
Cardiovascular Disease. *JACC.* VOL.66, NO.19, 2015. 450  
<http://dx.doi.org/10.1016/j.jacc.2015.09.025>. 451
5. Ahmed NO, Osman B, Abdelhai YM, El-Hadiyah TMH. Impact of clinical 452  
pharmacist intervention in anticoagulation clinic in Sudan. *Int J Clin Pharm.* 453  
<http://doi.org/10.1007/s11096-017-0475-x>. 454
6. Gallagher J, McCarthy S, Byrne S. Economic evaluations of clinical pharmacist 455  
interventions on hospital inpatients: a systematic review of recent literature. 456

|                                                                                                                                                                                                                                                                                                                                            |                          |
|--------------------------------------------------------------------------------------------------------------------------------------------------------------------------------------------------------------------------------------------------------------------------------------------------------------------------------------------|--------------------------|
| Int J Clin Pharm. 2014; 36: 1101–1114. <a href="https://doi.org/10.1007/s11096-014-0008-9">https://doi.org/10.1007/s11096-014-0008-9</a> . PMID: 25218003                                                                                                                                                                                  | 457<br>458               |
| 7. .ChengY, Raisch DW, BorregoME, GupchupGV. Economic, clinical, and humanistic outcomes (ECHO)of pharmaceutical care services for minority patients: A literature review. Res Soc Adm Pharm. 2013;9: 311–329. <a href="https://doi.org/10.1016/j.sapharm.2012.05.004">https://doi.org/10.1016/j.sapharm.2012.05.004</a> .                 | 459<br>460<br>461<br>462 |
| 8. Chua SS, Kok LC, Yusof FAM, et al. Pharmaceutical care issues identified by pharmacists in patients with diabetes, hypertension, or hyperlipidemia in primary care settings. BMC Health Serv Res 2012;12:388.                                                                                                                           | 463<br>464<br>465        |
| 9. Rotta I, Salgado TM, Silva ML et al. Effectiveness of clinical pharmacy services: an overview of systematic reviews (2000-2010). Int J Clin Pharm. 2015; 37:687-97.                                                                                                                                                                     | 466<br>467<br>468        |
| 10. Potter EL, Lew TE, Sooriyakumaran M, Edwards AM, Tong E, Aung AK. Evaluation of pharmacist- led physician- supported inpatient deprescribing model in older patients admitted to an acute general medical unit. Australas J Ageing. 2019;00:1–5. <a href="https://doi.org/10.1111/ajag.12643">https://doi.org/10.1111/ajag.12643</a> . | 469<br>470<br>471<br>472 |
| 11. Brunisholz KD, Olson J, Anderson JW. “Pharming out” support: a promising approach to integrating clinical pharmacists into established primary care medical home practices. J Int Med Res. 2018; 46:234-48.                                                                                                                            | 473<br>474<br>475        |
| 12. Brandi L. Bowers, et al. Impact of Pharmacist-Physician Collaboration on Osteoporosis Treatment Rates. Ann Pharmacother. 2018. <a href="https://doi.org/10.1177/1060028018770">https://doi.org/10.1177/1060028018770</a> .                                                                                                             | 476<br>477<br>478        |
| 13. Melissa C. Norton et al. Impact of Physician-Pharmacist Collaboration on Diabetes Outcomes and Health Care Use J Am Board Fam Med 2020;33:745–753.                                                                                                                                                                                     | 479<br>480<br>481        |
| 14. Ip EJ, Shah BM, Yu J et al. Enhancing diabetes care by adding a pharmacist to the primary care team. Am J Health-Syst Pharm. 2013; 70:877-86.                                                                                                                                                                                          | 482<br>483               |
| 15. Heisler M, Hofer TP, Schmittdiel JA et al. Improving blood pressure control through a clinical pharmacist outreach program in patients with diabetes                                                                                                                                                                                   | 484<br>485               |

|                                                                                                                                                                                                                                                                                                                                                                                            |                                 |
|--------------------------------------------------------------------------------------------------------------------------------------------------------------------------------------------------------------------------------------------------------------------------------------------------------------------------------------------------------------------------------------------|---------------------------------|
| mellitus in 2 high-performing health systems: the Adherence and Intensification of Medications Cluster Randomized, Controlled Pragmatic Trial. <i>Circulation</i> . 2012; 125:2863-72.                                                                                                                                                                                                     | 486<br>487<br>488               |
| 16. Steven M. Smith et al. Physician-pharmacist collaboration versus usual care for treatment-resistant hypertension. <i>J Am Soc Hypertens</i> 2016. <a href="http://dx.doi.org/10.1016/j.jash.2016.01.010">http://dx.doi.org/10.1016/j.jash.2016.01.010</a> .                                                                                                                            | 489<br>490<br>491               |
| 17. Pape GA, Hunt JS, Butler KL et al. Team-based care approach to cholesterol management in diabetes mellitus: two-year cluster randomized controlled trial. <i>Arch Intern Med</i> . 2011; 171:1480-6.                                                                                                                                                                                   | 492<br>493<br>494               |
| 18. Nevo, O. N., Lesko, C. R., Colwell, B., Ballard, C., Cole, S. R., & Mathews, W. C. (2015). Outcomes of pharmacist-assisted management of antiretroviral therapy in patients with HIV infection: A risk-adjusted analysis. <i>American Journal of Health-System Pharmacy</i> , 72(17), 1463–1470. <a href="https://doi.org/10.2146/ajhp140727">https://doi.org/10.2146/ajhp140727</a> . | 495<br>496<br>497<br>498<br>499 |
| 19. Alshakka M, Hatem NAH, Badullah W, et al. Detection of Short-Term Side Effects of ChAdOx1 nCoV-19 Vaccine: A Cross-Sectional Study in a WarTorn Country. <i>Pragmat Obs Res</i> . 2022;13:85-91. Published 2022 Aug 25. doi:10.2147/POR.S381836                                                                                                                                        | 500<br>501<br>502<br>503        |
| 20. Hepler CD, Strand LM. Opportunities and responsibilities in pharmaceutical care. <i>Am J Hosp Pharm</i> . 1990;47(3):533-543                                                                                                                                                                                                                                                           | 504<br>505                      |
| 21. Legislation.Gov.UK. The Medicines for Human Use (Prescribing) (Miscellaneous) Amendments) Order. 2006. No. 915. Retrieved December, 2018. Available from: <a href="http://www.legislation.gov.uk/uksi/2006/915/contents/made">http://www.legislation.gov.uk/uksi/2006/915/contents/made</a>                                                                                            | 506<br>507<br>508<br>509        |
| 22. Bourne RS, Baqir W, Onatade R. Pharmacist independent prescribing in secondary care: opportunities and challenges. <i>Int J Clin Pharm</i> . 2016;38(1):1–6. <a href="https://doi.org/10.1007/s1109">https://doi.org/10.1007/s1109</a>                                                                                                                                                 | 510<br>511<br>512               |
| 23. 6-015-0226-9. 8. Tan EC, Stewart K, Elliott RA, George J. Pharmacist consultations in general practice clinics: the Pharmacists in Practice Study                                                                                                                                                                                                                                      | 513<br>514                      |

- (PIPS). Res Soc Administr Pharm RSAP. 2014;10(4):623–32. 515  
<https://doi.org/10.1016/j.sapharm.2013.08.005>. 516
24. Preslaski CR, Lat I, MacLaren R, Poston J. Pharmacist contributions as 517  
members of the multi-disciplinary ICU. Team. Chest. 2013;144(5):1687–95. 518  
<https://doi.org/10.1378/chest.12-1615>. 519
25. Smith WE, Ray MD, Shannon DM. Doctors’ expectations of pharmacists. Am 520  
J Health Syst Pharm. 2002;59(1):50–7. 521
26. Bradley CP. The future role of pharmacists in primary care. Br J Gen Pract. 522  
2009;59(569):891–2. <https://doi.org/10.3399/bjgp09X473105>. 523
27. Bhagavathula AS, Sarkar BR, Patel I. Clinical pharmacy practice in 524  
developing countries: focus on India and Pakistan. Arch Pharma Pract. 525  
2014;5:91–4. 526
28. Mehralian G, Rangchian M, Javadi A, Peiravian F. Investigation on barriers to 527  
pharmaceutical care in community pharmacies: a structural equation model. 528  
Int J Clin Pharm. 2014;36(5):1087–94. <https://doi.org/10.1007/s11096-014-9998-6>. 529  
9998-6. 530
29. Fakeye TO, Adisa R, Olukotun RT, Morawo PK. Hospital and community 531  
pharmacists’ perception of the scope, barriers and challenges of pharmacy 532  
practice-based research in Nigeria. Pharm Pract. 2017;15(1):881. 533
30. Khan TT. Challenges to pharmacy and pharmacy practice in Pakistan. 534  
Australas Med J. 2011;4(4):230. <https://doi.org/10.4066/AMJ.2011.488>. 535
31. Al-Worafi YM. Pharmacy practice and its challenges in Yemen. Austral Med 536  
J. 2014;7(1):17–23. 537
32. Al-Worafi YMA. Chapter.14—pharmacy practice in Yemen. In: Fathelrahman 538  
AI,Ibrahim MIM, WertheimerAI, editors. Pharmacy practice in developing 539  
countries. Boston: Academic Press;2016. 540
33. Vinterflod C, Gustafsson M, Mattsson S, Gallego G. Physicians' perspectives 541  
on clinical pharmacy services in Northern Sweden: a qualitative study. BMC 542

|                                                                                                                                                                                                                                                                                                        |                                 |
|--------------------------------------------------------------------------------------------------------------------------------------------------------------------------------------------------------------------------------------------------------------------------------------------------------|---------------------------------|
| Health Serv Res. 2018;18(1):35. Published 2018 Jan 24. doi:10.1186/s12913-018-2841-3.                                                                                                                                                                                                                  | 543<br>544                      |
| 34. Almazrou S, Alnaim L, Al-Kofide H. Perceptions, expectations and barriers of physicians towards working with clinical pharmacists in Saudi Arabia. J Sci Res Rep. 2015;6(5):404–415. doi:10.9734/jsrr/2015/11637                                                                                   | 545<br>546<br>547               |
| 35. Gelaw B, Tegegne G, Defersha A. Knowledge, attitudes and practice of physicians towards clinical pharmacy services in ten public hospitals in Oromia regional state Ethiopia. Epidemiol Sunnyvale. 2017;7(323):1165–21611.                                                                         | 548<br>549<br>550<br>551        |
| 36. Mahmoud MI, Maatoug MM, Jomaa AAFA, Yousif M. Sudanese Medical Doctors' Perceptions, Expectations, Experiences and Perceived Barriers Towards the Roles of Clinical Pharmacists: A Cross-Sectional Study. Integr Pharm Res Pract. 2022;11:97-106. Published 2022 Jul 18. doi:10.2147/IPRP.S354717. | 552<br>553<br>554<br>555<br>556 |
| 37. Kabba JA, James PB, Hanson C, et al. Sierra Leonean doctors' perceptions and expectations of the role of pharmacists in hospitals: a national cross-sectional survey. Int J Clin Pharm. 2020;42(5):1335-1343. doi:10.1007/s11096-020-01096-z.                                                      | 557<br>558<br>559<br>560        |
| 38. Khan N, McGarry K, Naqvi AA, Holden K. Doctors' perceptions, expectations and experience regarding the role of pharmacist in hospital settings of Pakistan. Int J Clin Pharm. 2020;42(2):549-566. doi:10.1007/s11096-020-00991-9.                                                                  | 561<br>562<br>563<br>564        |
| 39. Crafford L, Kusurkar RA, Bronkhorst E, Gous A, Wouters A. Understanding of healthcare professionals towards the roles and competencies of clinical pharmacists in South Africa. BMC Health Serv Res. 2023;23(1):290. Published 2023 Mar 28. doi:10.1186/s12913-023-09222-z.                        | 565<br>566<br>567<br>568        |
| 40. Alsuhebany N, Alfehaid L, Almodaimegh H, Albekairy A, Alharbi S. Attitude and Perception of Physicians and Nurses Toward the Role of Clinical Pharmacists in Riyadh, Saudi Arabia: A Qualitative Study. SAGE Open Nursing. 2019;5. doi:10.1177/2377960819889769                                    | 569<br>570<br>571<br>572        |

|                                                                                                                                                                                                                                                                                           |                          |
|-------------------------------------------------------------------------------------------------------------------------------------------------------------------------------------------------------------------------------------------------------------------------------------------|--------------------------|
| 41. Bilal AI, Tilahun Z, Beedemariam G, Ayalneh B, Hailemeskel B, Engidawork E. Attitude and satisfaction of health care providers towards clinical pharmacy services in Ethiopia: a post-deployment survey. <i>J Pharm Policy Pract.</i> 2016;9:7.                                       | 573<br>574<br>575<br>576 |
| 42. Ahmed NO, Abdulghani MAM, Alrebdi SF, Baobaid MF. PERCEPTIONS OF PHYSICIANS ABOUT CLINICAL PHARMACIST'S ROLE IN AL QASSIM'S HOSPITALS IN SAUDI ARABIA. <i>Malays. J. Public Health Med.</i> 2017;17(3):109-16. doi: 10.37268/mjphm/vol.17/no.3/art.220                                | 577<br>578<br>579<br>580 |
| 43. Gebremariam ET, Taye GM, Alemayehu D. Knowledge, attitudes health professionals towards clinical pharmacy services in selected hospitals in west Shoa zone, Ethiopia. <i>Biomedical Statistics and Informatics.</i> 2020;5(1):9-13. Doi: 10.11648/j.bsi.20200501.12.                  | 581<br>582<br>583<br>584 |
| 44. Wolfe ME, Moeller KE, Woods B. Medical students' perceptions on the role of pharmacists. <i>J Pharm Pract.</i> 2017;31(6):623–8. <a href="https://doi.org/10.1177/0897190017734764">https://doi.org/10.1177/0897190017734764</a> .                                                    | 585<br>586<br>587        |
| 45. Haxby D., Weart C., Goodman B. J. (1988). Family practice physicians' perceptions of the usefulness of drug therapy recommendations from clinical pharmacists. <i>American Journal of Health-System Pharmacy</i> , 45(4), 824–827.                                                    | 588<br>589<br>590        |
| 46. Althomali A, Altowairqi A, Alghamdi A, et al. Impact of Clinical Pharmacist Intervention on Clinical Outcomes in the Critical Care Unit, Taif City, Saudi Arabia: A Retrospective Study. <i>Pharmacy (Basel).</i> 2022;10(5):108. Published 2022 Aug 31. doi:10.3390/pharmacy10050108 | 591<br>592<br>593<br>594 |
| 47. Desse TA, Vakil K, Mc Namara K, Manias E. Impact of clinical pharmacy interventions on health and economic outcomes in type 2 diabetes: A systematic review and meta-analysis. <i>Diabet Med.</i> 2021;38(6):e14526. doi:10.1111/dme.14526                                            | 595<br>596<br>597<br>598 |
| 48. Shrestha S, Shrestha R, Ahmed A, et al. Impact of pharmacist services on economic, clinical, and humanistic outcome (ECHO) of South Asian patients: a systematic review. <i>J Pharm Policy Pract.</i> 2022;15(1):37. Published 2022 May 10. doi:10.1186/s40545-022-00431-1            | 599<br>600<br>601<br>602 |

|                                                                                                                                                                                                                                                                                                                                                         |                                 |
|---------------------------------------------------------------------------------------------------------------------------------------------------------------------------------------------------------------------------------------------------------------------------------------------------------------------------------------------------------|---------------------------------|
| 49. Lattard C, Baudouin A, Larbre V, et al. Clinical and economic impact of clinical oncology pharmacy in cancer patients receiving injectable anticancer treatments: a systematic review [published online ahead of print, 2023 Feb 28]. <i>J Cancer Res Clin Oncol.</i> 2023;10.1007/s00432-023-04630-4. doi:10.1007/s00432-023-04630-4               | 603<br>604<br>605<br>606<br>607 |
| 50. Kheir N, Zaidan M, Younes H, El Hajj M, Wilbur K, Jewesson P. Pharmacy Education and Practice in 13 Middle Eastern Countries. <i>Am J Pharm Educ</i> 2008; 72: 133.                                                                                                                                                                                 | 608<br>609<br>610               |
| 51. Abduekarem A, Sharif S. Current Levels of Interaction between the Physician and Pharmacist: A Comparative Study in Libya and UAE. <i>Jordan J Pharm Sci</i> 2008; 1: 146-155.                                                                                                                                                                       | 611<br>612<br>613               |
| 52. Abbas A, Shah A, Khan N, Nasir H, Khan MH. Perceptions of patients' care givers regarding clinical pharmacists and their practice in a developing country. <i>Int J Pharm Pharm Sci.</i> 2014;7(2):168–73                                                                                                                                           | 614<br>615<br>616               |
| 53. Khan N, Abbas A, McGarry K, Shahid S. Perceptions and experiences of doctors regarding integration of clinical pharmacists in health practices: a survey of hospitals of Karachi. <i>Int J Allied Med Sci Clin Res.</i> 2014;2(3):222–34.                                                                                                           | 617<br>618<br>619<br>620        |
| 54. Adnan S, Tanwir S, Abbas A, Beg AE, Sabah A, Safdar H, et al. Perception of doctors regarding patient counseling by pharmacist: a blend of quantitative and qualitative insight. <i>Int J Pharm Ther.</i> 2014;5:117–21.                                                                                                                            | 621<br>622<br>623               |
| 55. Hatem NAH, Mohamed Ibrahim MI, Halboup A, Kubas M. A Multi-Institutional Study of Yemeni Final Year Undergraduate Pharmacy Students' Understanding, Attitudes, and Perceived Barriers Toward Provision of Pharmaceutical Care: A Cross-Sectional Study. <i>Adv Med Educ Pract.</i> 2023;14:109-121. Published 2023 Feb 11. doi:10.2147/AMEP.S392886 | 624<br>625<br>626<br>627<br>628 |
| 56. Sabry NA, Farid SF. The role of clinical pharmacists as perceived by Egyptian physicians. <i>Int J Pharm Pract.</i> 2014;22(5):354–359. doi:10.1111/ijpp.12087                                                                                                                                                                                      | 629<br>630                      |
| 57. Hambisa S, Abie A, Nureye D, Yimam M. Attitudes, Opportunities, and Challenges for Clinical Pharmacy Services in Mizan-Tepi University Teaching                                                                                                                                                                                                     | 631<br>632                      |



|                                                                                                                                                                                                                                                                                                               |                          |
|---------------------------------------------------------------------------------------------------------------------------------------------------------------------------------------------------------------------------------------------------------------------------------------------------------------|--------------------------|
| Hospital, Southwest Ethiopia: Health Care Providers' Perspective. Adv<br>Pharmacol Pharm Sci. 2020;2020:5415290. Published 2020 Mar 31.<br>doi:10.1155/2020/5415290.                                                                                                                                          | 633<br>634<br>635        |
| 58. Al-Worafi YM. Drug safety in Yemen. Drug safety in developing countries.<br>Cambridge (MA): Elsevier; 2020. P. 391-405.                                                                                                                                                                                   | 636<br>637               |
| 59. Li X, Huo H, Kong W, Li F, Wang J. Physicians' perceptions and attitudes<br>toward clinical pharmacy services in urban general hospitals in China. Int J<br>Clin Pharm. 2014;36(2):443-450. doi:10.1007/s11096-014-9919-8.                                                                                | 638<br>639<br>640        |
| 60. Thelma Onozato, et al. Factors influencing the implementation of clinical<br>pharmacy services for hospitalized patients: A mixed-methods systematic<br>review, Res Soc Adm Pharm. (2019).<br><a href="https://doi.org/10.1016/j.sapharm.2019.06.018">https://doi.org/10.1016/j.sapharm.2019.06.018</a> . | 641<br>642<br>643<br>644 |
